# Supplementary material for: Mass Spectrometry Reveals Changes in MHC I Antigen Presentation After Lentivector Expression of a Gene Regulation System
Source: PubMed Central journal article supplement — Mol Ther Nucleic Acids. 2013 Feb 12;2(2):e75–. doi: 10.1038/mtna.2013.3 (PMC3586803; doi:10.1038/mtna.2013.3), 2013-02-12
Supplement: mtna20133x1.pdf [file mtna20133x1.pdf]

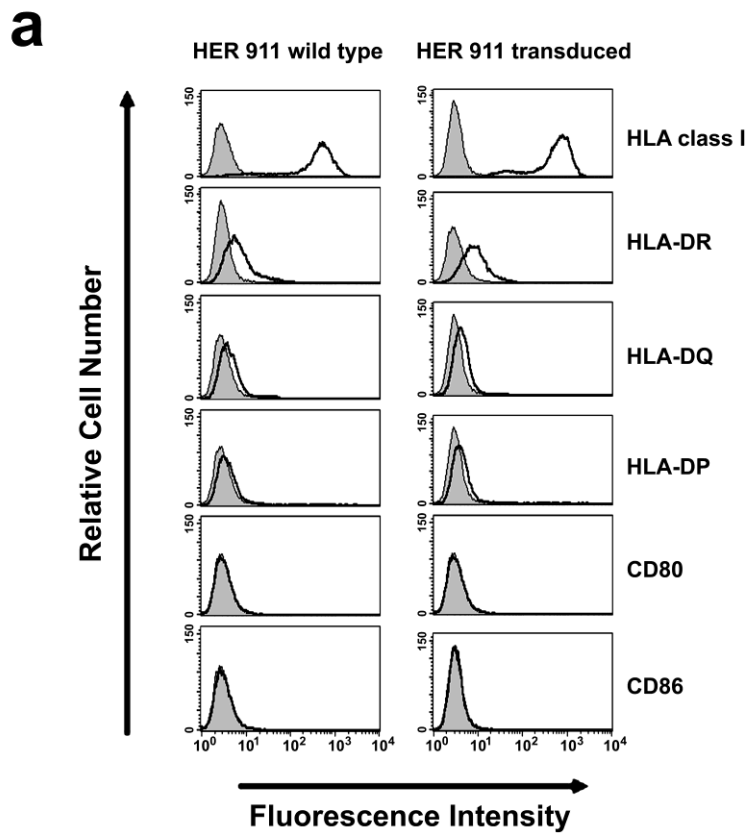

**b**

| HEK 293T   | MHC class I | HLA-DR   | HLA-DQ  | HLA-DP   | CD80 | CD86 |
|------------|-------------|----------|---------|----------|------|------|
| wild type  | 98% (89)    | 43% (7)  | 16% (8) | 51% (25) | -    | -    |
| transduced | 99% (61)    | 58% (8)  | 20% (7) | 33% (8)  | -    | -    |
| HER 911    | MHC class I | HLA-DR   | HLA-DQ  | HLA-DP   | CD80 | CD86 |
| wild type  | 98% (403)   | 35% (11) | 14% (5) | 9% (9)   | -    | -    |
| transduced | 100% (490)  | 50% (11) | 18% (9) | 17% (11) | -    | -    |
| D 407      | MHC class I | HLA-DR   | HLA-DQ  | HLA-DP   | CD80 | CD86 |
| wild type  | 99% (251)   | 8% (11)  | 8% (6)  | 9% (74)  | -    | -    |
| transduced | 99.9% (273) | 9% (10)  | 20% (6) | 13% (25) | -    | -    |

**Supplementary figure S1: (a) Flow cytometric analysis of the expression of MHC I, MHC II (HLA-DR, HLA-DQ and HLA-DP), CD80, and CD86 molecules by wt and transduced HER 911 cells.** Unfilled histograms represent cells after immunofluorescence labelling, grey filled histograms give respective isotype controls. For labeling anti-CD80 (L307.4) and anti-CD86 (FUN-1) antibodies (BD Biosciences) as well as affinity purified anti-MHC I (W6/32), anti-MHC II HLA-DR (L243), HLA-DP (B7/21) and HLA-DQ (33.1) antibodies were used. Un-conjugated primary antibodies were detected with phycoerythrin-conjugated goat anti-mouse IgG(H+L) antibody (BD Biosciences). **(b) Expression of immune relevant molecules by wt and transduced HEK 293T, HER 911 and D 407 cells as revealed as percentages of positive cells (%) and mean fluorescence intensities (in parenthesis).** The data are means of three independent experiments performed at different times of culture.
