# Supplementary material for: Mass Spectrometry Reveals Changes in MHC I Antigen Presentation After Lentivector Expression of a Gene Regulation System
Source: PubMed Central journal article supplement — Mol Ther Nucleic Acids. 2013 Feb 12;2(2):e75–. doi: 10.1038/mtna.2013.3 (PMC3586803; doi:10.1038/mtna.2013.3), 2013-02-12
Supplement: mtna20133x2.pdf [file mtna20133x2.pdf]

## a ACTIVATION

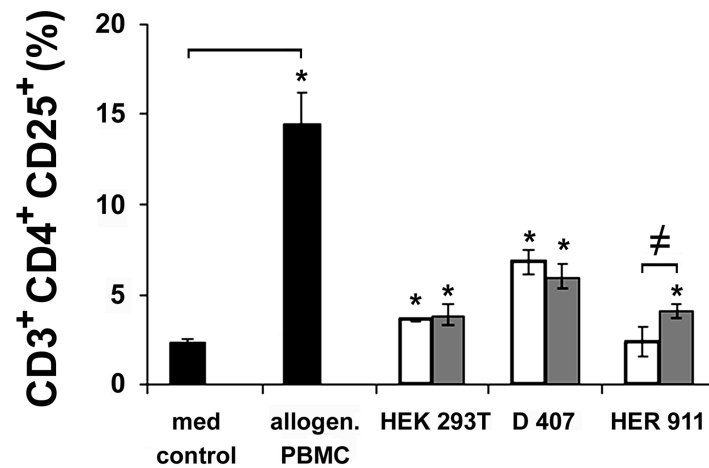

## b PROLIFERATION

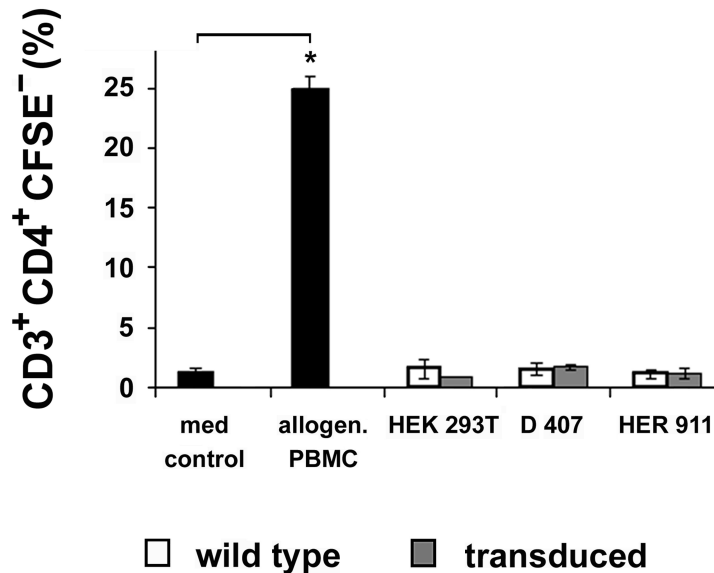

**Supplementary figure S2: Allogeneic immune responses to wt and transduced cells mediated by MHC class II.** CSFE-labeled PBMCs were incubated with medium alone, or co-cultured with control allogeneic PBMCs, wt or transduced cells. (a) Activation of CD3<sup>+</sup>CD4<sup>+</sup> T cells as determined by the expression of CD25. (b) Proliferation of CD3<sup>+</sup>CD4<sup>+</sup> T cells as evaluated by determining the percentages of dividing T cells. Results are expressed as mean values  $\pm$  SD for three independent experiments each performed in triplicate at different times of culture (\*p<0.05). Note: Control allogeneic PBMCs triggered large responses both in terms of activation and proliferation, as expected (positive control).
